# Supplementary material for: Magnetically Bioprinted Human Myometrial 3D Cell Rings as A Model for Uterine Contractility
Source: Int J Mol Sci. 2017 Mar 23;18(4):683. doi: 10.3390/ijms18040683 (PMC5412269; doi:10.3390/ijms18040683)
Supplement: Supplementary file 1 [file ijms-18-00683-s001.pdf]

# Supplementary Materials: Magnetically Bioprinted Human Myometrial 3D Cell Rings as a Model for Uterine Contractility

Glauco R. Souza, Hubert Tseng, Jacob A. Gage, Arunmani Mani, Pujan Desai, Fransisca Leonard, Angela Liao, Monica Longo, Jerrie S. Refuerzo, Biana Godin

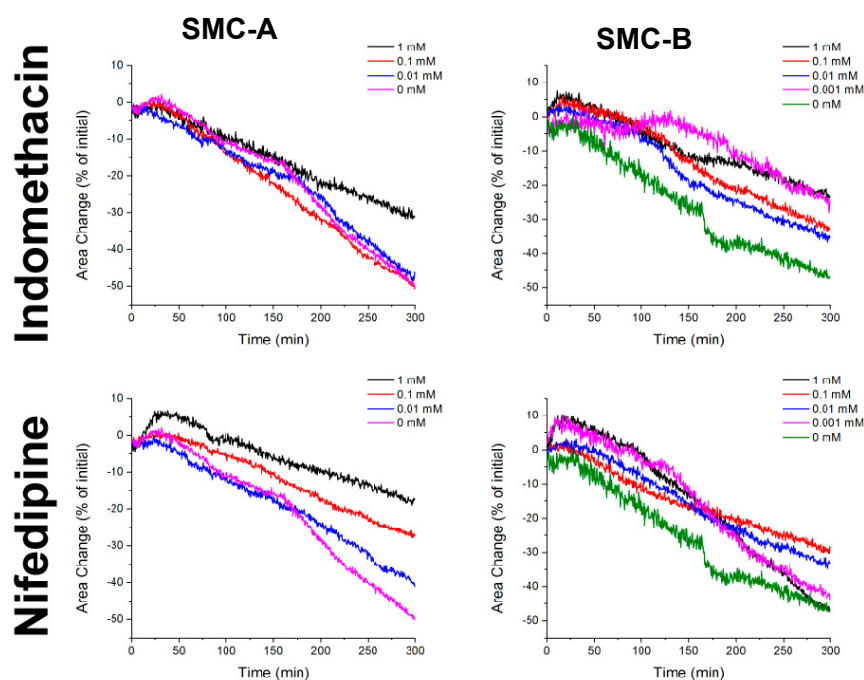

**Figure S1.** Time series of contraction by rings of commercially available smooth muscle cell (SMC)-A and SMC-B (PromoCell GmbH, Heidelberg, Germany), exposed to indomethacin and nifedipine. Exposure to the drug reduced contractions, particularly at higher concentrations, as expected. Moreover, each cell type had a different response to drugs, demonstrating our ability to detect differences between cell types.

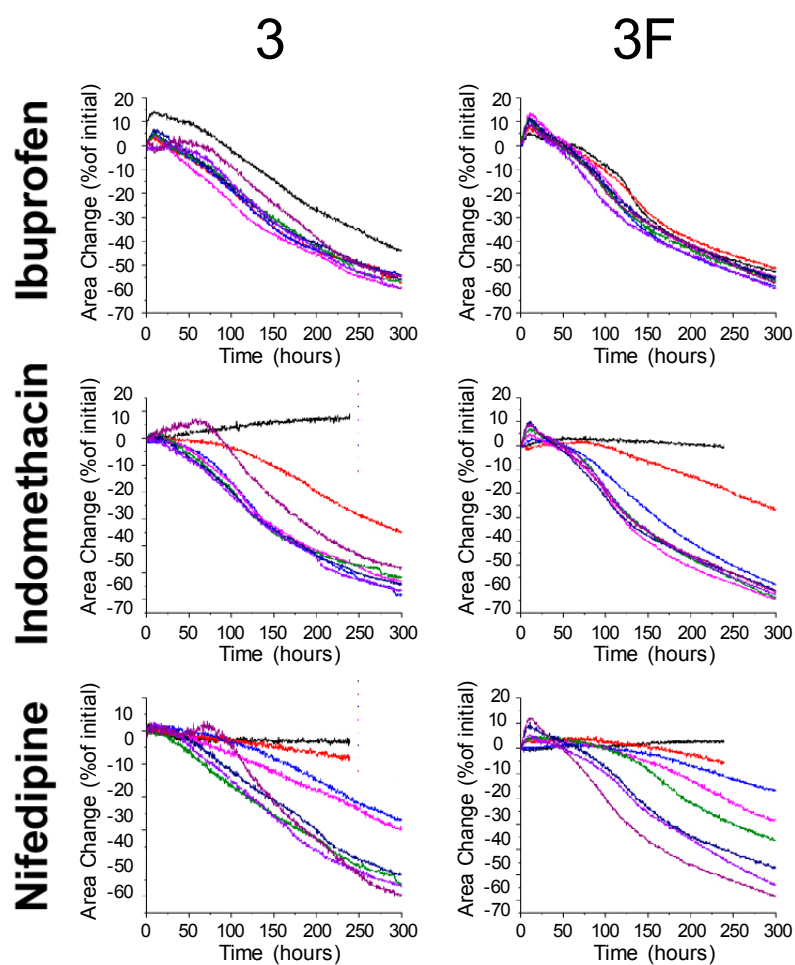

**Figure S2.** Comparison between the contraction of fresh and cryopreserved patient-derived myometrial smooth muscle rings over time. The contraction profiles of myometrial smooth muscle rings from Patient 3 exposed to varying concentrations of different compounds. The data show that the contractility responses are preserved after cryopreservation of the uterine tissue.
